# Supplementary material
Source: bioRxiv or medRxiv preprint supplement (https://www.biorxiv.org/highwire/filestream/9562/field_highwire_adjunct_files/0/035667-1.pdf)
Supplement: Supplementary file [file 035667-1.pdf]

**Supplementary Figure 1.** Histograms of the request time in millisecond for actual user requests to the gene query service (top) and the gene annotation service (bottom) of MyGene.info. The number on each bar indicates the actual count. The data were extracted from the logs of server nodes during recent 30-day period (08/01/2015-09/01/2015).

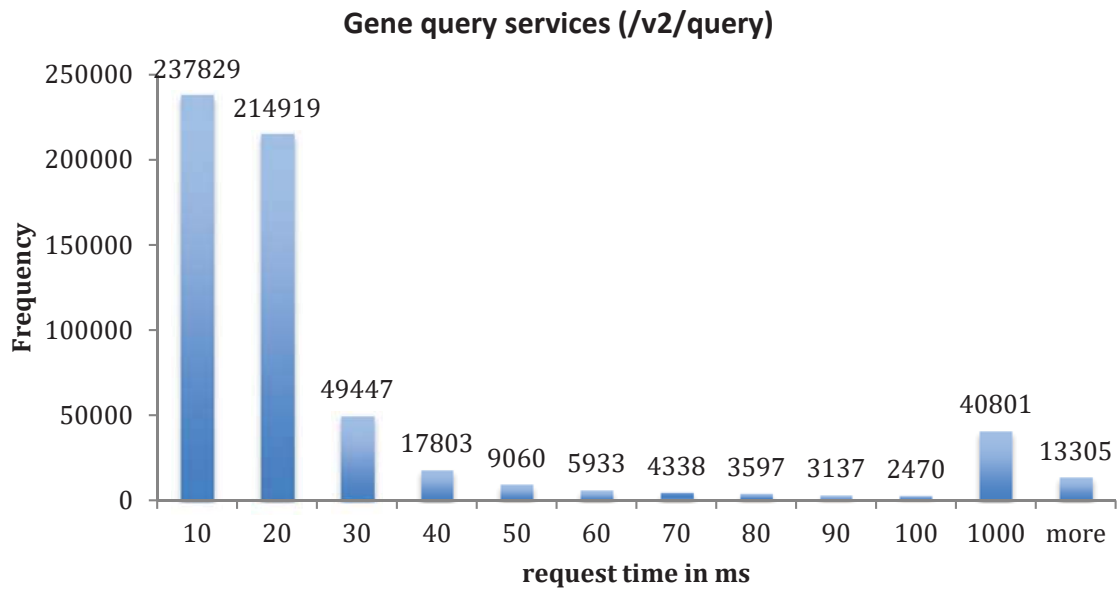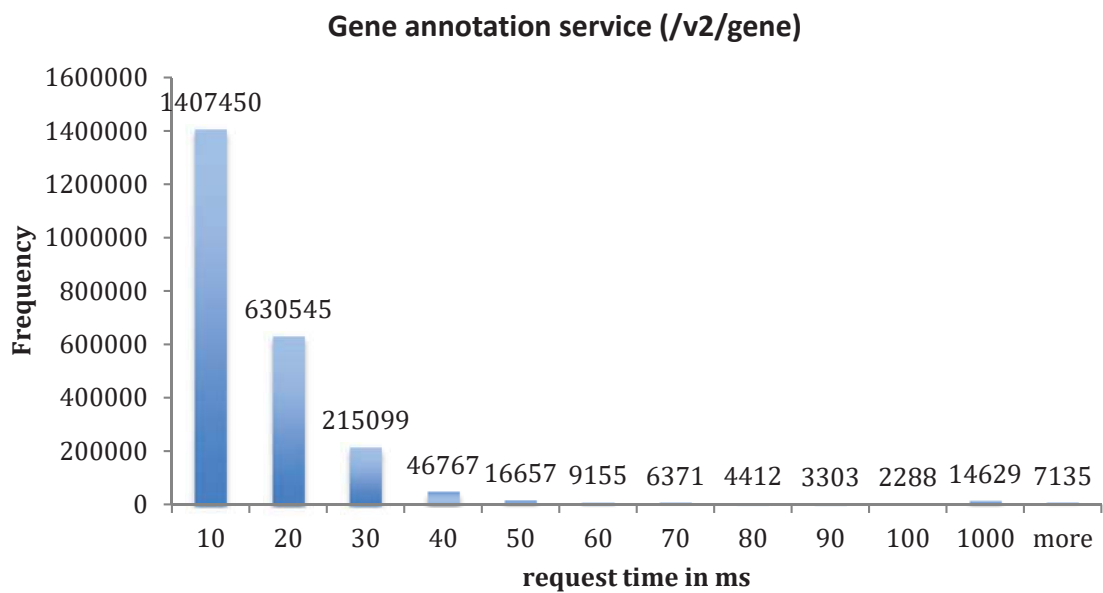

**Supplementary Figure 2.** Two examples of JSON annotation objects stored and indexed at a) MyGene.info and b) MyVariant.info. Some contents are collapsed and the full objects can be viewed at the links above.

a) <http://MyGene.info/v2/gene/7157>

```
{
  _id: "7157",
  ▶ accession: { ... },
  ▶ alias: [ ... ],
  ▶ ensembl: { ... },
  entrezgene: 7157,
  ▶ exons: { ... },
  ▶ exons_hg19: { ... },
  ▶ generif: [ ... ],
  ▶ genomic_pos: { ... },
  ▶ genomic_pos_hg19: { ... },
  ▶ go: { ... },
  HGNC: "11998",
  ▶ homologene: { ... },
  HPRD: "01859",
  ▶ interpro: [ ... ],
  ▶ ipi: [ ... ],
  map_location: "17p13.1",
  MIM: "191170",
  name: "tumor protein p53",
  ▶ pathway: { ... },
  ▶ pdb: [ ... ],
  ▶ pfam: [ ... ],
  pharmgkb: "PA36679",
  pir: "A25224",
  ▶ reagent: { ... },
  ▶ refseq: { ... },
  ▶ reporter: { ... },
  ▶ retired: [ ... ],
  summary: "This gene encodes a tumor
  suppressor protein containing
  transcriptional activation, DNA binding,
  ...",
  symbol: "TP53",
  taxid: 9606,
  type_of_gene: "protein-coding",
  ▶ unigene: [ ... ],
  ▶ uniprot: { ... },
  Vega: "OTTHUMG00000162125",
  ▶ wikipedia: { ... }
}
```

b) <http://MyVariant.info/v1/variant/chr7:g.55241707G>T>

```
{
  _id: "chr7:g.55241707G>T",
  _version: 1,
  ▶ cadd: { ... },
  ▶ clinvar: { ... },
  ▼ cosmic: {
    alt: "T",
    chrom: "7",
    cosmic_id: "COSM6253",
    ▼ hg19: {
      end: 55241707,
      start: 55241707
    },
    mut_freq: 0.04,
    mut_nt: "G>T",
    ref: "G",
    tumor_site: "lung"
  },
  ▶ dbnsfp: { ... },
  ▶ dbsnp: { ... },
  ▶ docm: { ... },
  ▶ mutdb: { ... },
  ▶ snpedia: { ... },
  ▶ snpeff: { ... },
  ▶ vcf: { ... }
}
```

**Supplementary Table 1.** Data sources for MyGene.info and MyVariant.info.

- (a) Column one lists the names of all 8 data sources included in MyGene.info. Column two lists the version of each data source. Column three lists the url link for each data source.

| <b>Source</b> | <b>Version</b> | <b>Url</b>                                                                                                  |
|---------------|----------------|-------------------------------------------------------------------------------------------------------------|
| NCBI Entrez   | 2015-10-24     | <a href="http://www.ncbi.nlm.nih.gov/gquery/">http://www.ncbi.nlm.nih.gov/gquery/</a>                       |
| Ensembl       | 82             | <a href="http://www.ensembl.org/">http://www.ensembl.org/</a>                                               |
| Uniprot       | 2015-10-15     | <a href="http://www.uniprot.org/">http://www.uniprot.org/</a>                                               |
| NetAffy       | na35           | <a href="https://www.affymetrix.com/analysis/index.affx">https://www.affymetrix.com/analysis/index.affx</a> |
| PharmGKB      | 2015-10-05     | <a href="https://www.pharmgkb.org/">https://www.pharmgkb.org/</a>                                           |
| UCSC          | 2015-10-20     | <a href="https://genome.ucsc.edu/">https://genome.ucsc.edu/</a>                                             |
| CPDB          | 31             | <a href="http://cpdb.molgen.mpg.de/">http://cpdb.molgen.mpg.de/</a>                                         |
| RefSeq        | 68             | <a href="http://www.ncbi.nlm.nih.gov/refseq/">http://www.ncbi.nlm.nih.gov/refseq/</a>                       |

(b) Column one lists the names of all 14 data sources included in MyVariant.info. Column two lists the version of each data source. Column three shows the number of variants for each data source included in Myvariant.info. Column four lists the url link for each data source.

| Source       | Version   | # of variants | Url                                                                                                                 |
|--------------|-----------|---------------|---------------------------------------------------------------------------------------------------------------------|
| dbNSFP       | v3.0c     | 82,030,830    | <a href="https://sites.google.com/site/jpopgen/dbNSFP">https://sites.google.com/site/jpopgen/dbNSFP</a>             |
| dbSNP        | v144      | 145,132,257   | <a href="http://www.ncbi.nlm.nih.gov/snp/">http://www.ncbi.nlm.nih.gov/snp/</a>                                     |
| ClinVar      | 2015-09   | 114,627       | <a href="http://www.ncbi.nlm.nih.gov/clinvar/">http://www.ncbi.nlm.nih.gov/clinvar/</a>                             |
| EVS          | v2        | 1,977,300     | <a href="http://evs.gs.washington.edu/EVS/">http://evs.gs.washington.edu/EVS/</a>                                   |
| CADD         | v1.2      | 163,690,986   | <a href="http://cadd.gs.washington.edu/">http://cadd.gs.washington.edu/</a>                                         |
| MutDB        | -         | 420,221       | <a href="http://www.mutdb.org/">http://www.mutdb.org/</a>                                                           |
| GWAS Catalog | from UCSC | 15,243        | <a href="http://www.ebi.ac.uk/gwas/">http://www.ebi.ac.uk/gwas/</a>                                                 |
| COSMIC       | v68       | 1,024,498     | <a href="http://cancer.sanger.ac.uk/cosmic/">http://cancer.sanger.ac.uk/cosmic/</a>                                 |
| DOCM         | -         | 1,119         | <a href="http://docm.genome.wustl.edu/">http://docm.genome.wustl.edu/</a>                                           |
| SNPedia      | -         | 5,907         | <a href="http://www.snpedia.com/index.php/SNPedia">http://www.snpedia.com/index.php/SNPedia</a>                     |
| EMVClass     | -         | 12,066        | <a href="http://geneticslab.emory.edu/emvclass/emvclass.php">http://geneticslab.emory.edu/emvclass/emvclass.php</a> |
| Welllderly   | -         | 21,240,519    | <a href="http://www.stsiweb.org/wellderly/">http://www.stsiweb.org/wellderly/</a>                                   |
| EXAC         | v0.3      | 10,195,872    | <a href="http://exac.broadinstitute.org/">http://exac.broadinstitute.org/</a>                                       |
| GRASP        | v2.0.0.0  | 2,212,148     | <a href="http://grasp.nhlbi.nih.gov/Overview.aspx">http://grasp.nhlbi.nih.gov/Overview.aspx</a>                     |

**Supplementary Table 2.** Examples of HGVS (Human Genome Variation Society) nomenclature.

| <b>Variant types</b> | <b>HGVS nomenclature</b>    | <b>Notes</b>                              |
|----------------------|-----------------------------|-------------------------------------------|
| Substitution         | chr1:g.241T>C               | single nucleotide substitution            |
| Deletion             | chr1:g.413del               | single nucleotide deletion                |
|                      | chr1:g.290_297del           | >1 nucleotide deletion                    |
| Duplication          | chr1:g.413dup               | single nucleotide duplication             |
|                      | chr1:g.692_694dup           | several nucleotide duplication            |
| Insertion            | chr1:g.451_452insT          | single nucleotide insertion               |
|                      | chr1:g.451_452insGAGA       | several nucleotide insertion              |
|                      | chr1:g.777_778insAB012345.1 | large insertion with a submitted sequence |
| Inversion            | chr1:g.1077_1080inv         | short inversion                           |
|                      | chr1:g.1458_oXYZ:457inv     | large inversion                           |

**Supplementary note 1. This is the print out of the jupyter notebook at:**  
[https://github.com/sulab/myvariant.info/blob/master/docs/ipynb/myvariant\\_R\\_miller.ipynb](https://github.com/sulab/myvariant.info/blob/master/docs/ipynb/myvariant_R_miller.ipynb)

myvariant.info (/github/sulab/myvariant.info/tree/master) / docs (/github/sulab/myvariant.info/tree/master/docs)  
/ ipynb (/github/sulab/myvariant.info/tree/master/docs/ipynb)

## MyVariant.info and MyGene.info Use Case

The following R script demonstrates the utility of the **MyVariant.info** and **MyGene.info** R clients to annotate variants and prioritize candidate genes in patients with rare Mendelian diseases. This specific study uses data obtained from the database of phenotype and genotype (dbGaP) study. FASTQ files generated by Ng et al for the [Miller syndrome study](http://www.ncbi.nlm.nih.gov/pubmed/19915526) (<http://www.ncbi.nlm.nih.gov/pubmed/19915526>) were processed according to the Broad Institute's best practices. Individual samples were aligned to the hg19 reference genome using BWA-MEM 0.7.10. Variants were called using GATK 3.3-0 HaplotypeCaller and quality scores were recalibrated using GATK VariantRecalibrator.

### Initial Library Imports and Data Loading

```
In [1]: library(myvariant, quietly=TRUE)
library(mygene, quietly=TRUE)
library(VariantAnnotation, quietly=TRUE)
library(GO.db, quietly=TRUE)
source("https://raw.githubusercontent.com/SuLab/myvariant.info/master/docs/ipynb/mendelian.R")
setwd("~/sulab/myvariant/vcf/recal")
vcf.files <- paste(getwd(), list.files(getwd()), sep="/")
```

Attaching package: 'BiocGenerics'

The following objects are masked from 'package:parallel':

```
clusterApply, clusterApplyLB, clusterCall, clusterEvalQ,
clusterExport, clusterMap, parApply, parCapply, parLapply,
parLapplyLB, parRapply, parSapply, parSapplyLB
```

The following object is masked from 'package:stats':

```
xtabs
```

The following objects are masked from 'package:base':

```
anyDuplicated, append, as.data.frame, as.vector, cbind, colnames,
do.call, duplicated, eval, evalq, Filter, Find, get, intersect,
is.unsorted, lapply, Map, mapply, match, mget, order, paste, pmax,
pmax.int, pmin, pmin.int, Position, rank, rbind, Reduce, rep.int,
rownames, sapply, setdiff, sort, table, tapply, union, unique,
unlist, unsplit
```

Creating a generic function for 'nchar' from package 'base' in package 'S4Vectors'

Attaching package: 'VariantAnnotation'

The following object is masked from 'package:base':

```
tabulate
```

Welcome to Bioconductor

```
Vignettes contain introductory material; view with
'browseVignettes()'. To cite Bioconductor, see
'citation("Biobase")', and for packages 'citation("pkgname")'.
```

Loading required package: DBI

Attaching package: 'plyr'

The following object is masked from 'package:XVector':

```
compact
```

The following object is masked from 'package:IRanges':

```
desc
```

The following object is masked from 'package:S4Vectors':

```
rename
```

vcf.files contains paths to the vcf files for each of the four patients included in this analysis. Exome sequence data from two sibs with Miller syndrome and two unrelated affected individuals used in this vignette was provided by Ng et al. (2010) *Nature Genetics* (p1s00244.v1.p1) (<http://www.ncbi.nlm.nih.gov/pubmed/19915526>). As this is protected information, access must be requested from dbGaP [here](http://www.ncbi.nlm.nih.gov/projects/gap/cgi-bin/study.cgi?study_id=phs000244.v1.p1) ([http://www.ncbi.nlm.nih.gov/projects/gap/cgi-bin/study.cgi?study\\_id=phs000244.v1.p1](http://www.ncbi.nlm.nih.gov/projects/gap/cgi-bin/study.cgi?study_id=phs000244.v1.p1)) in order to run this notebook.

mendelian.R defines some helper functions that are used in the analysis occurring after annotation retrieval:

replaceWith0 - replaces all NAs in a data.frame with 0.

rankByCaddScore - for prioritizing genes by deleteriousness (scaled CADD score).

---

## Annotating variants with MyVariant.info

The following function reads in each output VCF file using the VariantAnnotation package available from Bioconductor. Install with `biocLite("VariantAnnotation")`. `formatHgvs` (from the *myvariant* Bioconductor package) is a function that reads the genomic location and variant information from the VCF to create HGVS IDs which serve as a primary key for each variant. The function `getVariants` makes the queries to MyVariant.info to retrieve annotations.

```
In [2]: getVars <- function(vcf.file){
  cat(paste("Processing ", vcf.file, "...\n", sep=" "))
  vcf <- readVcf(vcf.file, genome="hg19")
  vcf <- vcf[isSNV(vcf)]
  vars <- rowRanges(vcf)
  vars <- as(vars, "DataFrame")
  vars$query <- formatHgvs(vcf, "snp")
  annotations <- getVariants(vars$query, fields=c("dbnsfp.genename", "dbnsfp.1000gpl.af",
                                                "exac.af", "cadd.consequence", "cadd.phred"), verbose=FALSE)

  annotations[c('DP', 'FS', 'QD')] <- info(vcf)[c('DP', 'FS', 'QD')]
  annotations <- replaceWith0(annotations)
  annotations <- subset(annotations, !(dbnsfp.genename %in% c("NULL", 0)))
  annotations
}

vars <- lapply(vcf.files, getVars)
```

```
Processing /Users/cyrusafrasiabi/recal/subject01_recalibrate_SNP_vqsr.vcf ...
found header lines for 3 'fixed' fields: ALT, QUAL, FILTER
found header lines for 24 'info' fields: AC, AF, ..., VQSLOD, culprit
found header lines for 5 'geno' fields: GT, AD, DP, GQ, PL
```

Concatenating data, please be patient.

```
Processing /Users/cyrusafrasiabi/recal/subject02_recalibrate_SNP_vqsr.vcf ...
found header lines for 3 'fixed' fields: ALT, QUAL, FILTER
found header lines for 24 'info' fields: AC, AF, ..., VQSLOD, culprit
found header lines for 5 'geno' fields: GT, AD, DP, GQ, PL
```

Concatenating data, please be patient.

```
Processing /Users/cyrusafrasiabi/recal/subject03_recalibrate_SNP_vqsr.vcf ...
found header lines for 3 'fixed' fields: ALT, QUAL, FILTER
found header lines for 24 'info' fields: AC, AF, ..., VQSLOD, culprit
found header lines for 5 'geno' fields: GT, AD, DP, GQ, PL
```

Concatenating data, please be patient.

```
Processing /Users/cyrusafrasiabi/recal/subject04_recalibrate_SNP_vqsr.vcf ...
found header lines for 3 'fixed' fields: ALT, QUAL, FILTER
found header lines for 24 'info' fields: AC, AF, ..., VQSLOD, culprit
found header lines for 5 'geno' fields: GT, AD, DP, GQ, PL
```

Concatenating data, please be patient.

All genes (variants with a valid `dbnsfp.genename`) that are mutated amongst all four patients are examined. The following function counts the number of genes in `inp` that are mutated among all four patients:

```
In [3]: countGenes <- function(inp) {
  ret <- subset(data.frame(table(unlist(lapply(inp, function(i) unique(i$dbnsfp.genename))))),
  Freq == 4)
  cat("Genes remaining: ", paste(nrow(ret)))
  ret
}
```

### Initial Number of Genes Mutated in All Patients

```
In [4]: nVars <- countGenes(vars)

Genes remaining: 2441
```

---

```
In [5]: filter1 <- lapply(vars, function(i) subset(i, DP > 8 & FS < 30 & QD > 2))
nFilter1 <- countGenes(filter1)
Genes remaining: 2308
```

## 2 - Filtering for Nonsynonymous and Splice Site Variants

Mendelian diseases are most likely to be caused by nonsynonymous mutations. The CADD database annotates the mutation type in the field "cadd.consequence".

```
In [6]: filter2 <- lapply(filter1, function(i) subset(i, cadd.consequence %in% c("NON_SYNONYMOUS", "STOP_GAINED", "STOP_
CANONICAL_SPLICE", "SPLICE_SITE")))
nFilter2 <- countGenes(filter2)
Genes remaining: 1917
```

## 3 - Filtering for Allele Frequency Annotated by ExAC

The third filter keeps rare variants according to the ExAC data set with allele frequency < 0.01. Rare diseases are likely caused by mutations that have not been documented yet.

```
In [7]: filter3 <- lapply(filter2, function(i) subset(i, exac.af < 0.01))
nFilter3 <- countGenes(filter3)
Genes remaining: 18
```

## 4 - Filtering for Allele Frequency Annotated by 1000 Genomes Project

The fourth filter keeps rare variants according to the 1000 Genomes Project with allele frequency < 0.01.

```
In [8]: filter4 <- lapply(filter3, function(i) subset(i, sapply(dbsfp.1000gp1.af, function(j) j < 0.01 )))
top.genes <- countGenes(filter4)
Genes remaining: 9
```

## 5 - Filtering by GO Biological Process Annotation using MyGene.info

Since Miller Syndrome is known to be an inborn error of metabolism, this filter keeps only genes involved in metabolic processes according to their GO biological process annotation. To accomplish this, GO biological process annotations are pulled for each remaining gene using the **MyGene.info** R client, which can be installed from Bioconductor (`biocLite("mygene")`). Here, the `queryMany` function is used, requesting the necessary annotations using the `fields` parameter.

```
In [9]: goBP <- data.frame(queryMany(top.genes$Var1, scopes="symbol", species="human", fields=c("go.BP", "name", "MIM"),
Finished
```

The Bioconductor package **go.DB** is used to find all genes with a GO biological process annotation that is a descendant of GO:0008152 - the GO id for metabolic process.

```
In [10]: miller.bp <- lapply(goBP$go.BP, function(i) unlist(i$id))
bp.ancestor <- lapply(miller.bp, function(i) sapply(i, function(j) "GO:0008152" %in% unlist(GOBPANCESTOR[[j]]))
candidate.genes <- top.genes$Var1[sapply(bp.ancestor, function(i) TRUE %in% i)]
cat("Genes remaining: ", length(candidate.genes))
Genes remaining: 5
```

## Prioritizing genes

The remaining five genes can be prioritized according to CADD (deleteriousness) score. `rankByCaddScore` extracts the average CADD scores of the variants in each gene and ranks in descending order.



```
In [11]: ranked <- rankByCaddScore(candidate.genes, filter4)
ranked
```

Out[11]:

|   | gene   | cadd.phred |
|---|--------|------------|
| 1 | DHODH  | 26.81      |
| 2 | CTBP2  | 21.385     |
| 3 | PIK3R3 | 20.7       |
| 4 | CDC27  | 18.545     |
| 5 | CDON   | 10.02      |

This analysis highlights the use of the **MyVariant.info** and **MyGene.info** annotation services to narrow the candidate gene list from 2441 genes to 5 - representing a significant decrease in the burden of manual biological analysis.
